# Platelet Response to Clopidogrel Is Attenuated in Diabetic Patients Undergoing Coronary Stent Implantation

TOBIAS GEISLER, MD  
NICOLE ANDERS, MD  
MARIA PATEROK, MD  
HARALD LANGER, MD  
KONSTANTINOS STELOS, MD

STEPHAN LINDEMANN, MD  
CHRISTIAN HERDEG, MD  
ANDREAS E. MAY, MD  
MEINRAD GAWAZ, MD

**T**ype 2 diabetes is accompanied by platelet function disorders leading to an accelerated process of atherosclerosis and increased risk for atherothrombotic complications (1–4). Previous data (5,6) suggest a worse outcome for diabetic patients after acute coronary events. Recently, a high variability of response to clopidogrel measured by platelet function tests has been reported (7) among patients with percutaneous coronary intervention (PCI), and hyporesponsiveness to clopidogrel has been considered to influence cardiac outcome in these patients (8–10). Impaired response to antiplatelet therapy in diabetic patients has been reported (11,12) in small patient collectives. However, little is known about the effects of type 2 diabetes on response after a 600-mg clopidogrel loading dose in large unselected cohorts of patients with symptomatic coronary artery disease (CAD).

## RESEARCH DESIGN AND METHODS

— Type 2 diabetic and nondiabetic patients treated by coronary stenting for symptomatic CAD were consecutively enrolled in this study. The protocol was approved by the local ethics committee, and signed informed consent was obtained from all patients. Patients with known platelet function disorders,

thrombocytopenia ( $<10^5$  cells/mm<sup>3</sup>), or any contraindications against clopidogrel were excluded. A loading dose of 600 mg clopidogrel was given to all patients before PCI, followed by 75 mg every day. All patients received a daily dose of 100 mg aspirin before PCI. A standard dose of heparin was given to all patients immediately before PCI unless there were no contraindications. Type 2 diabetes was defined according to the recommendations of the American Diabetes Association (13).

Patient blood was collected  $\geq 6$  h ( $46.6 \pm 99.3$  h) after administration of 600 mg clopidogrel, when maximum platelet inhibition was expected (14). Among the subgroups of diabetic and nondiabetic patients, there was no significant time difference between PCI and light transmittance aggregometry (LTA). Blood samples were collected in 3.8% citrate plasma, as described. Percentage of platelet aggregation was assessed with the turbidimetric method using a Chronolog-Lumi aggregometer (Chronolog, Havertown, PA) with Aggro-Link software 5 min after addition of 20  $\mu$ mol/l ADP or 5  $\mu$ g/ml collagen.

We performed a  $\chi^2$  test for analysis of dichotomous variables. Differences between means of continuous variables with a normal distribution were evaluated with

Student's *t* test. *U* test (Mann-Whitney) was applied to compare platelet aggregation between two subgroups, and a Kruskal-Wallis test was used for comparison of multiple groups. We considered  $P < 0.05$  as statistically significant. Analyses were performed with SPSS (Version 13.0; SPSS, Chicago, IL).

**RESULTS** — In this study, 485 patients were consecutively enrolled. Of these, 161 (33.2%) had diabetes, 264 (54%) underwent elective procedure for stable angina, and 221 (46.0%) were treated by PCI for acute coronary syndrome (ACS) (unstable angina, non-ST elevation myocardial infarction, ST elevation myocardial infarction). For diabetic patients, mean A1C was  $7.7 \pm 1.6\%$  and mean blood glucose levels  $172 \pm 63$  mg/dl.

Posttreatment platelet reactivity to clopidogrel, measured by ADP-induced LTA, was lower in diabetic patients (40.0 vs. 31.8%,  $P = 0.01$ ). There was no significant impact of diabetes on collagen-induced aggregation (42.5 vs. 36.7%,  $P = 0.1$ ).

In a subgroup analysis of patients with coronary stenting for stable angina and patients with ACS, diabetic patients with ACS showed significantly higher posttreatment aggregation (ADP 46.3%,  $P = 0.002$  and collagen 45.7%,  $P = 0.005$ ) compared with nondiabetic patients with ACS (Fig. 1). A1C levels did not significantly influence platelet activity in this cohort (44.1 vs. 38.8%,  $P = 0.18$ ).

ADP-induced aggregation was highest in diabetic patients with acute coronary events 6–12 h after first administration of clopidogrel. Thereafter, platelet inhibition was similar in diabetic and nondiabetic patients (Fig. 1). Diabetic patients were slightly older than nondiabetic patients, more frequently suffered from severe left ventricular dysfunction, and received less  $\beta$ -blockers and statins, whereas diuretics were given more frequently. In univariate analysis, there was no significantly different distribution of age, sex, comedication, or cardiovascular risk factors between time groups except for a slightly higher ratio of smokers, mea-

From the Department of Cardiology/Internal Medicine, University Hospital Tübingen, Tübingen, Germany.

Address correspondence and reprint requests to Meinrad Gawaz, MD, Medizinische Klinik III, Universitätsklinikum Tübingen, Otfried-Müllerstr.10, 72076 Tübingen, Germany. E-mail: meinrad.gawaz@med.uni-tuebingen.de.

Received for publication 1 August 2006 and accepted in revised form 28 October 2006.

**Abbreviations:** ACS, acute coronary syndrome; ARMYDA, Antiplatelet Therapy for Reduction of Myocardial Damage During Angioplasty; CAD, coronary artery disease; EPISTENT, Evaluation of Platelet IIb/IIIa Inhibitor for Stenting Trial; LTA, light transmittance aggregometry; PCI, percutaneous coronary intervention; RPA, residual platelet activity.

A table elsewhere in this issue shows conventional and Système International (SI) units and conversion factors for many substances.

DOI: 10.2337/dc06-1625

© 2007 by the American Diabetes Association.

The costs of publication of this article were defrayed in part by the payment of page charges. This article must therefore be hereby marked "advertisement" in accordance with 18 U.S.C. Section 1734 solely to indicate this fact.

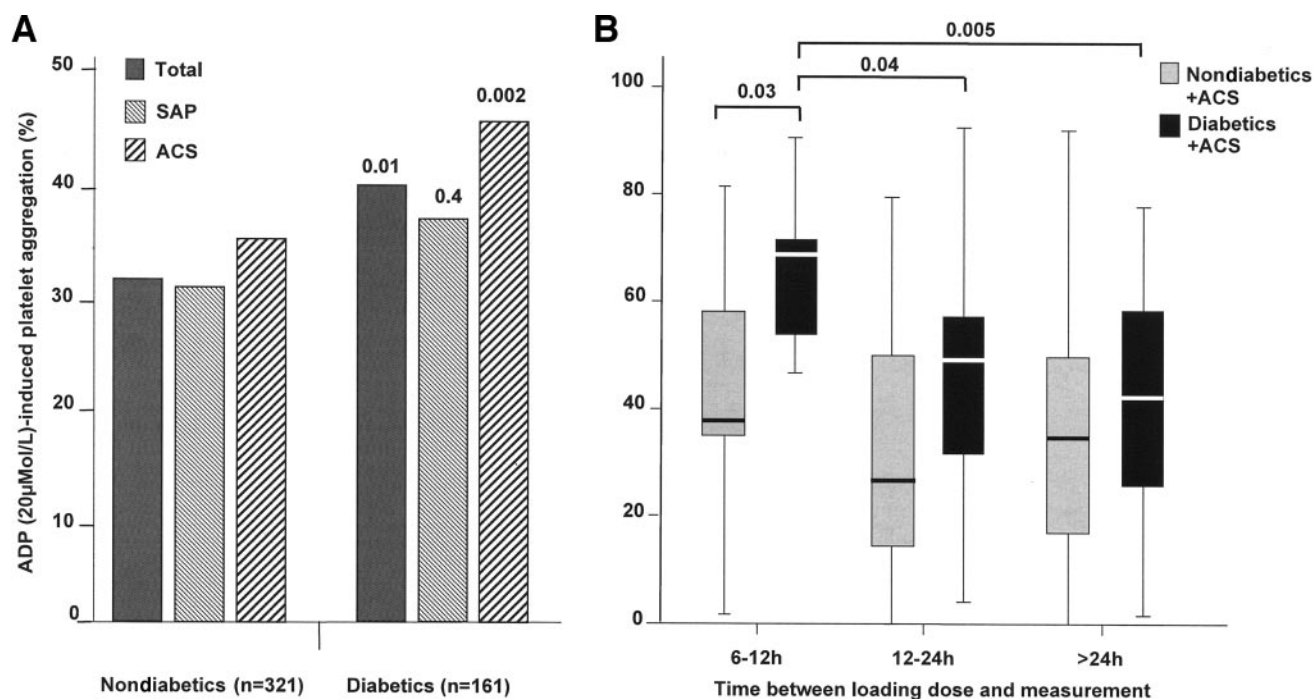

**Figure 1**—A: Residual ADP (20  $\mu$ mol/l)-induced platelet aggregation after a 600-mg clopidogrel loading dose in nondiabetic and diabetic patients with subgroups of patients with stable angina and ACS. P values describe differences between nondiabetic and diabetic subgroups. B: Box plot representing interindividual time dependency of response to clopidogrel measured by ADP (20  $\mu$ mol/l)-induced platelet aggregation in nondiabetic and diabetic patients with ACS. Each box shows the median, quartiles, and extreme values within a time category.

sured 6–12 h after a clopidogrel loading dose.

**CONCLUSIONS**— The principal finding of this consecutive study is that diabetic individuals with ACS show a lower response to a 600-mg clopidogrel loading dose. We measured platelet activity by LTA (with ADP), which has been established (7,14) as a reliable method for monitoring clopidogrel effects. As an additional marker of platelet reactivity, we assessed collagen-induced aggregation. Thus, we found type 2 diabetes to be associated with a decreased platelet response in a heterogeneous patient cohort with symptomatic CAD. Although diabetic individuals frequently present with other cardiovascular risk factors (such as hypertension and dyslipidemia) that contribute to chronic platelet activation, we could not observe a significant difference of these factors between diabetic and nondiabetic patients.

The present data suggest that diabetes has a substantial influence on residual platelet activity (RPA) observed in patients with acute coronary events. Thus, diabetic patients presenting with ACS might be at increased risk for recurrent atherothrombotic events partly due to suboptimal platelet inhibition. We did

not evaluate relative inhibition by measuring pretreatment reactivity. However, at a time point of >6 h after a 600-mg clopidogrel loading dose, when maximum platelet inhibition is expected (14), RPA was enhanced in diabetic patients. Also, we did not evaluate the influence of insulin therapy on RPA. There are reports (15,16) in the literature that insulin therapy is associated with increased platelet activity in diabetic cardiovascular patients.

Although not intra-individually measured, we observed a time-dependent effect of platelet response  $\leq 24$  h. This effect was most distinctive in patients with ACS and mostly independent of other factors in univariate analysis.

In a study of 16 diabetic and 36 nondiabetic patients, Angiolillo et al. (12) found that platelet response was attenuated after a 300-mg clopidogrel loading dose. This difference was still detectable  $\leq 24$  h later. The present study suggests that a 600-mg clopidogrel loading dose is not sufficient to overcome this effect, especially in diabetic patients with ACS.

Previous data (17) indicate that platelet hyperactivity plays a major role in the development of thrombotic complications in diabetes. There are data suggesting that diabetic patients gain a higher benefit from an intensified antiplatelet

regimen after PCI. In the Antiplatelet Therapy for Reduction of Myocardial Damage During Angioplasty (ARMYDA)-2 trial (18), 255 patients, including 31% diabetic patients, were randomized to receive either a 300- or 600-mg clopidogrel loading dose 4–8 h before procedure. At 30-day follow-up, the primary end point of death, myocardial infarction, or target vessel revascularization occurred in 4% of patients in the high-loading dose group versus 12% of those in the conventional-loading dose group ( $P = 0.041$ ). In the Evaluation of Platelet IIb/IIIa Inhibitor for Stenting Trial (EPISTENT) (19,20), additional treatment of diabetic patients with the platelet glycoprotein IIb-IIIa blockade for coronary stenting resulted in a reduction of 6-month death and myocardial infarction rate from 12.7 to 6.2% compared with stent placebo.

It is well recognized that platelet function in diabetic patients is different from that in nondiabetic patients. Moreover, diabetic patients show a reduced response to aspirin, which is probably related to an altered megakaryopoiesis (21–23). Here, we demonstrate that platelets from diabetic individuals with ACS do not adequately respond to clopidogrel therapy in a time-dependent man-

ner. This can be explained by altered resorption, altered liver metabolism, or altered platelet response. Although diabetic patients benefit from the antithrombotic effects of clopidogrel (24), both previous and present data suggest that an intensified antiplatelet therapy in type 2 diabetic patients with acute coronary events might improve cardiovascular outcome. Further randomized trials are needed to demonstrate the clinical benefit of an intensified or alternative antiplatelet regimen (e.g., novel antiplatelet substances such as prasugrel) in diabetic patients.

## References

- Vericel E, Januel C, Carreras M, Moulin P, Lagarde M: Diabetic patients without vascular complications display enhanced basal platelet activation and decreased antioxidant status. *Diabetes* 53:1046–1051, 2004
- Colwell JA, Nesto RW: The platelet in diabetes: focus on prevention of ischemic events. *Diabetes Care* 26:2181–2188, 2003
- Tschoepe D, Roesen P, Esser J, Schwippert B, Nieuwenhuis HK, Kehrel B, Gries FA: Large platelets circulate in an activated state in diabetes mellitus. *Semin Thromb Hemost* 17:433–438, 1991
- Tschoepe D, Roesen P, Kaufmann L, Schauseil S, Kehrel B, Ostermann H, Gries FA: Evidence for abnormal platelet glycoprotein expression in diabetes mellitus. *Eur J Clin Invest* 20:166–170, 1990
- Mak KH, Moliterno DJ, Granger CB, Miller DP, White HD, Wilcox RG, Califf RM, Topol EJ: Influence of diabetes mellitus on clinical outcome in the thrombolytic era of acute myocardial infarction: GUSTO-I Investigators: Global Utilization of Streptokinase and Tissue Plasminogen Activator for Occluded Coronary Arteries. *J Am Coll Cardiol* 30:171–179, 1997
- Haffner SM, Lehto S, Ronnema T, Pyorala K, Laakso M: Mortality from coronary heart disease in subjects with type 2 diabetes and in nondiabetic subjects with and without prior myocardial infarction. *N Engl J Med* 339:229–234, 1998
- Serebruany VL, Steinhubl SR, Berger PB, Malinin AI, Bhatt DL, Topol EJ: Variability in platelet responsiveness to clopidogrel among 544 individuals. *J Am Coll Cardiol* 45:246–251, 2005
- Müller I, Besta F, Schulz C, Massberg S, Schönig A, Gawaz M: Prevalence of clopidogrel non-responders among patients with stable angina pectoris scheduled for elective coronary stent placement. *Thromb Haemost* 89:783–787, 2003
- Gurbel PA, Bliden KP, Guyer K, Cho PW, Zaman KA, Kreutz RP, Bassi AK, Tantry US: Platelet reactivity in patients and recurrent events post-stenting: results of the Prepare Post-Stenting Study. *J Am Coll Cardiol* 46:1820–1826, 2005
- Geisler T, Langer H, Wydymus M, Gohring K, Zurn C, Bigalke B, Stellos K, May AE, Gawaz M: Low response to clopidogrel is associated with cardiovascular outcome after coronary stent implantation. *Eur Heart J* 27:2420–2425, 2006
- Fateh-Moghadam S, Plockinger U, Cabeza N, Htun P, Reuter T, Ersel S, Gawaz M, Dietz R, Bocksch W: Prevalence of aspirin resistance in patients with type 2 diabetes. *Acta Diabetol* 42:99–103, 2005
- Angiolillo DJ, Fernandez-Ortiz A, Bernardo E, Ramirez C, Sabate M, Jimenez-Quevedo P, Hernandez R, Moreno R, Escaned J, Alfonso F, Banuelos C, Costa MA, Bass TA, Macaya C: Platelet function profiles in patients with type 2 diabetes and coronary artery disease on combined aspirin and clopidogrel treatment. *Diabetes* 54:2430–2435, 2005
- American Diabetes Association: Diagnosis and classification of diabetes mellitus (Position Statement). *Diabetes Care* 27 (Suppl. 1):S5–S10, 2004
- Muller I, Seyfarth M, Rudiger S, Wolf B, Pogatsa-Murray G, Schomig A, Gawaz M: Effect of a high loading dose of clopidogrel on platelet function in patients undergoing coronary stent placement. *Heart* 85:92–93, 2001
- Hu H, Hjelm Dahl P, Li N: Effects of insulin on platelet and leukocyte activity in whole blood. *Thromb Res* 107:209–215, 2002
- Angiolillo DJ, Bernardo E, Ramirez C, Costa MA, Sabate M, Jimenez-Quevedo P, Hernandez R, Moreno R, Escaned J, Alfonso F, Banuelos C, Bass TA, Macaya C, Fernandez-Ortiz A: Insulin therapy is associated with platelet dysfunction in patients with type 2 diabetes mellitus on dual oral antiplatelet treatment. *J Am Coll Cardiol* 48:298–304, 2006
- Kabbani SS, Watkins MW, Ashikaga T, Terrien EF, Holoch PA, Sobel BE, Schneider DJ: Platelet reactivity characterized prospectively: a determinant of outcome 90 days after percutaneous coronary intervention. *Circulation* 104:181–186, 2001
- Patti G, Colonna G, Pasceri V, Pepe LL, Montinaro A, Di Sciascio G: Randomized trial of high loading dose of clopidogrel for reduction of periprocedural myocardial infarction in patients undergoing coronary intervention: results from the ARMYDA-2 (Antiplatelet therapy for Reduction of MYocardial Damage during Angioplasty) study. *Circulation* 111:2099–2106, 2005
- The Evaluation of Platelet IIb/IIIa Inhibitor for Stenting Trial (EPISTENT) Investigators: Randomised placebo-controlled and balloon-angioplasty-controlled trial to assess safety of coronary stenting with use of platelet glycoprotein-IIb/IIIa blockade: evaluation of platelet IIb/IIIa inhibitor for stenting. *Lancet* 352:87–92, 1998
- Marso SP, Lincoff AM, Ellis SG, Bhatt DL, Tanguay JF, Kleiman NS, Hammoud T, Booth JE, Sapp SK, Topol EJ: Optimizing the percutaneous interventional outcomes for patients with diabetes mellitus: results of the EPISTENT (Evaluation of platelet IIb/IIIa inhibitor for stenting trial) diabetic substudy. *Circulation* 100:2477–2484, 1999
- Mori TA, Vandongen R, Douglas AJ, McCulloch RK, Burke V: Differential effect of aspirin on platelet aggregation in IDDM. *Diabetes* 41:261–266, 1992
- Tschoepe D: The activated megakaryocyte-platelet-system in vascular disease: focus on diabetes. *Semin Thromb Hemost* 21:152–160, 1995
- Tanaka N, Sato T, Fujita H, Morita I: Constitutive expression and involvement of cyclooxygenase-2 in human megakaryocytopoiesis. *Arterioscler Thromb Vasc Biol* 24:607–612, 2004
- Angiolillo DJ, Fernandez-Ortiz A, Bernardo E, Ramirez C, Sabate M, Jimenez-Quevedo P, Hernandez R, Moreno R, Escaned J, Alfonso F, Banuelos C, Costa MA, Bass TA, Macaya C: Clopidogrel withdrawal is associated with proinflammatory and prothrombotic effects in patients with diabetes and coronary artery disease. *Diabetes* 55:780–784, 2006
